# Supplementary material for: Distinct Chemokine Dynamics in Early Postoperative Period after Open and Robotic Colorectal Surgery
Source: MDPI journal article supplement (doi:10.3390/jcm8060879), 2019-06-19
Supplement: s1 [file s1]

Supplementary Figure S6

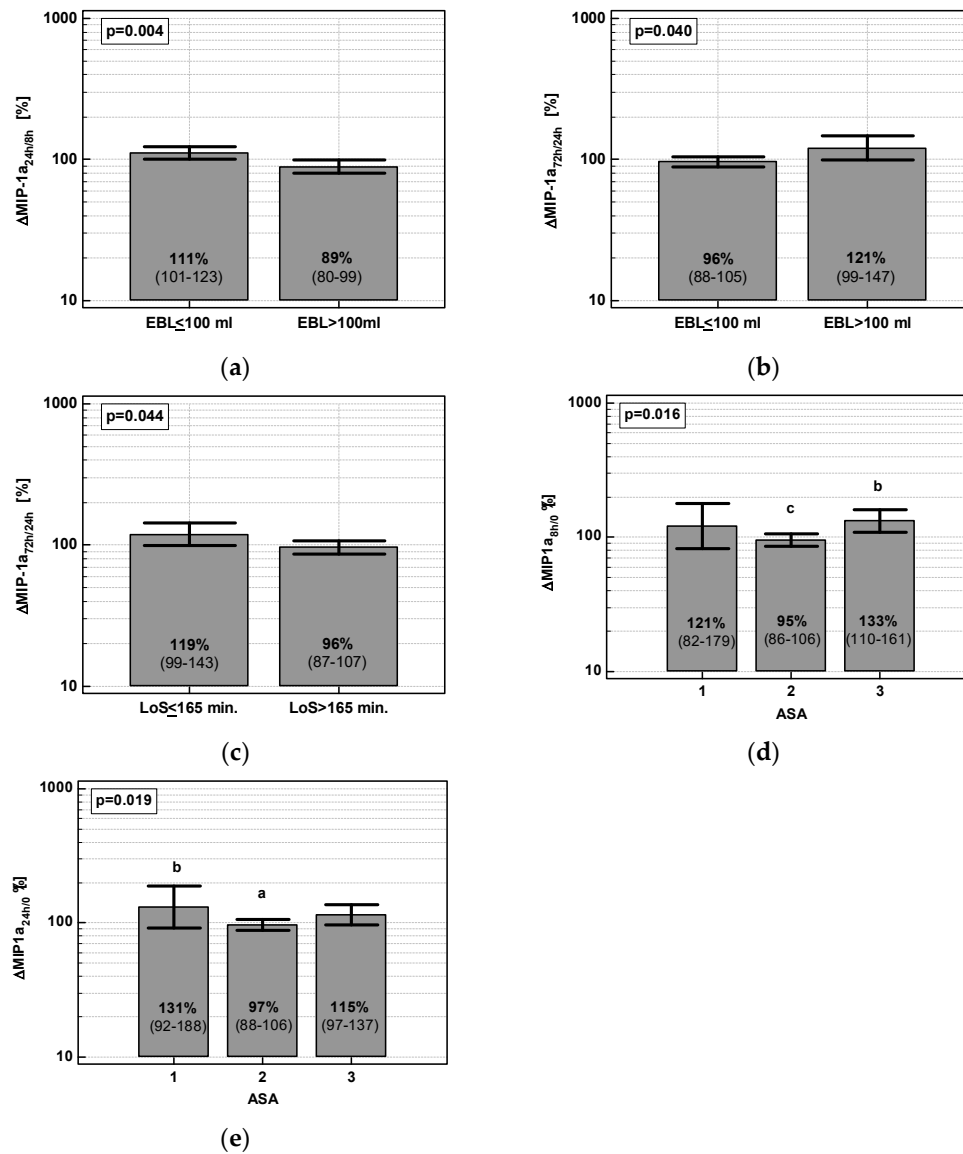

**Supplementary Figure S6.** Effect of various clinical parameters on percentage change in MIP-1 $\alpha$ : (a) estimated blood loss (EBL) on  $\Delta\text{MIP-1}\alpha_{24\text{h}/8\text{h}}$ ; (b) estimated blood loss (EBL) on  $\Delta\text{MIP-1}\alpha_{72\text{h}/24\text{h}}$ ; (c) length of surgery (LoS) on  $\Delta\text{MIP-1}\alpha_{72\text{h}/24\text{h}}$ ; (d) physical status classification system (ASA) score on  $\Delta\text{MIP-1}\alpha_{8\text{h}/0}$ ; (e) physical status classification system (ASA) score on  $\Delta\text{MIP-1}\alpha_{24\text{h}/0}$ . Data presented as geometric means with 95%CI and analyzed using t-test for independent samples (panels a-c) or one-way ANOVA (panels d-e). a, significantly different from ASA=1; b, significantly different from ASA=2; c, significantly different from ASA=3.
