# Supplementary material for: Distinct Chemokine Dynamics in Early Postoperative Period after Open and Robotic Colorectal Surgery
Source: MDPI journal article supplement (doi:10.3390/jcm8060879), 2019-06-19
Supplement: s1 [file s1]

Supplementary Figure S4

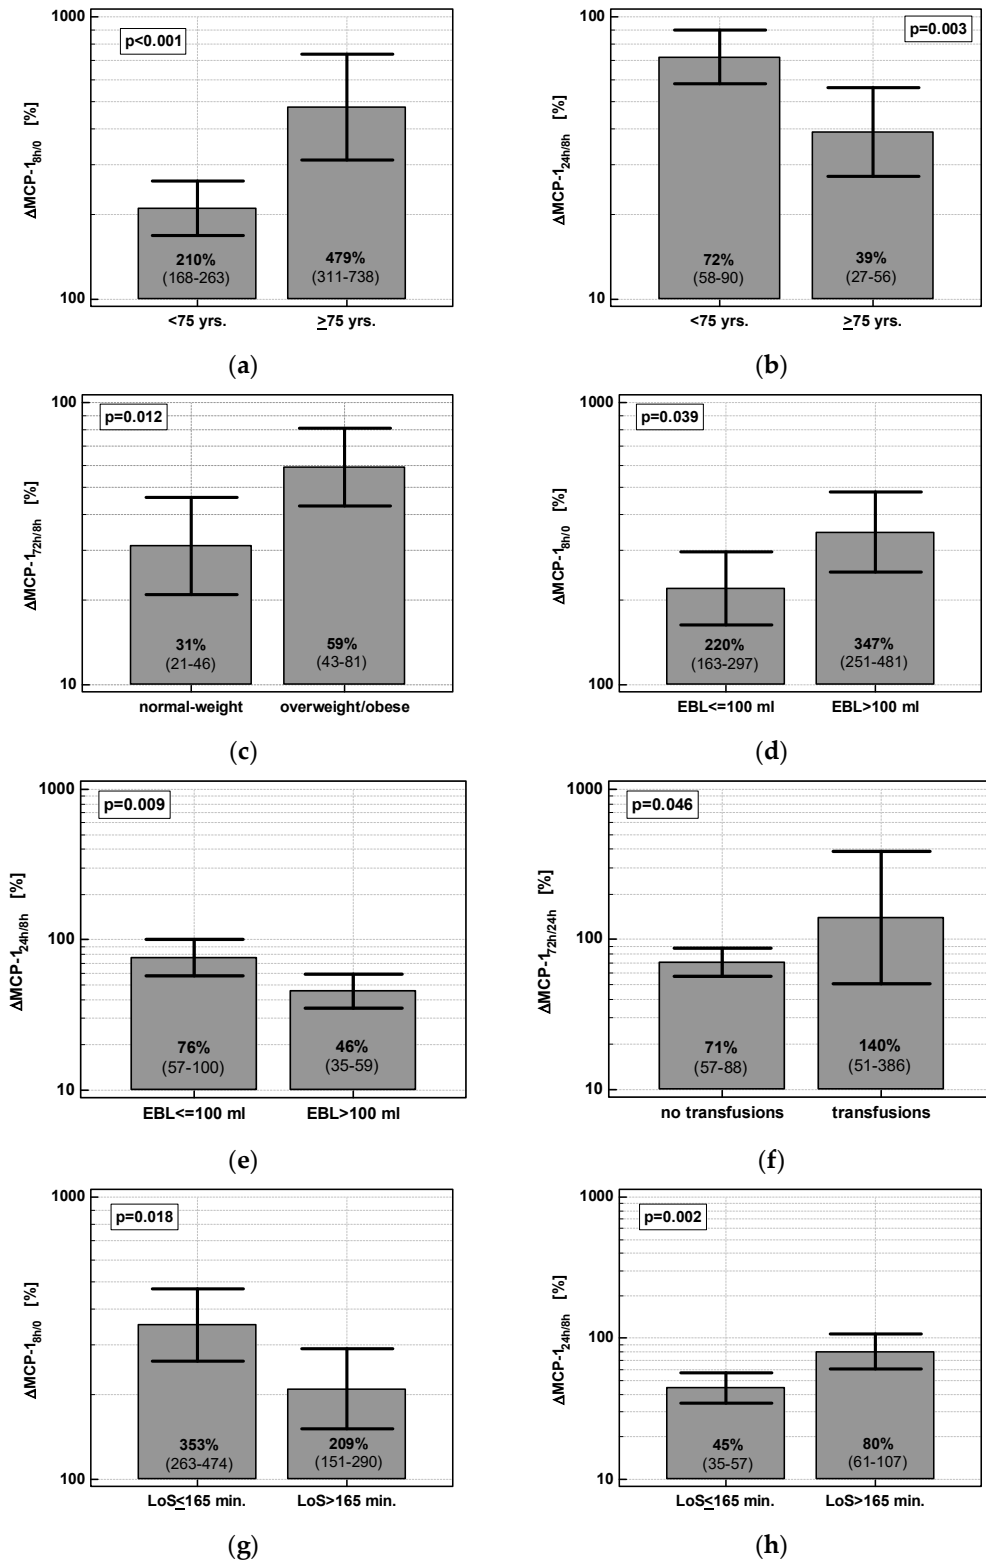

**Supplementary Figure S4.** Effect of various clinical parameters on percentage change in MCP-1: (a) patients' age on  $\Delta\text{MCP-1}_{8h/0}$ ; (b) patients' age on  $\Delta\text{MCP-1}_{24h/8h}$ ; (c) patient's BMI on  $\Delta\text{MCP-1}_{72h/8h}$ ; (d) estimated blood loss (EBL) on  $\Delta\text{MCP-1}_{8h/0}$ ; (e) estimated blood loss (EBL) on  $\Delta\text{MCP-1}_{24h/8h}$ ; (f) transfusions on  $\Delta\text{MCP-1}_{72h/24h}$ ; (g) length of surgery (LoS) on  $\Delta\text{MCP-1}_{8h/0}$ ; (h) length of surgery (LoS) on  $\Delta\text{MCP-1}_{24h/8h}$ . Data presented as geometric means with 95%CI and analyzed using t-test for independent samples.
