# Supplementary material for: Distinct Chemokine Dynamics in Early Postoperative Period after Open and Robotic Colorectal Surgery
Source: MDPI journal article supplement (doi:10.3390/jcm8060879), 2019-06-19
Supplement: s1 [file s1]

# Supplementary Figure S10

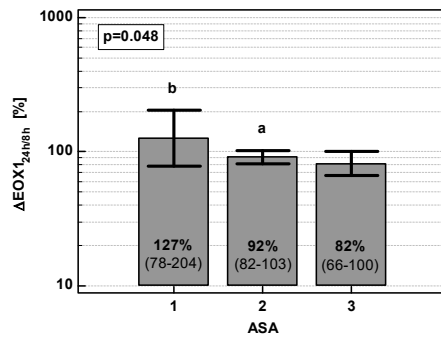

(a)

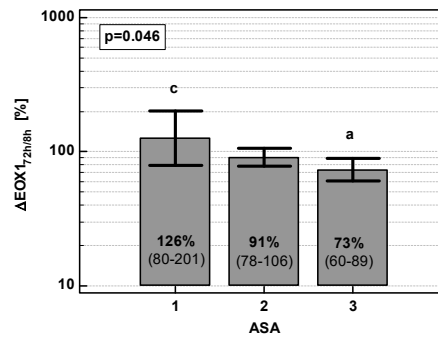

(b)

**Supplementary Figure S10.** Effect of physical status classification system (ASA) score on percentage change in eotaxin (EOX)-1: **(a)** percentage change between 24h and 8h post incision ( $\Delta\text{EOX1}_{24\text{h}/8\text{h}}$ ); **(b)** percentage change between 72h and 8h post incision ( $\Delta\text{EOX1}_{72\text{h}/8\text{h}}$ ). Data presented as geometric means with 95%CI and analyzed using one-way ANOVA. a, significantly different from ASA=1; b, significantly different from ASA=2; c, significantly different from ASA=3.
