# Supplementary material for: Distinct Chemokine Dynamics in Early Postoperative Period after Open and Robotic Colorectal Surgery
Source: MDPI journal article supplement (doi:10.3390/jcm8060879), 2019-06-19
Supplement: s1 [file s1]

## Supplementary Figure S2

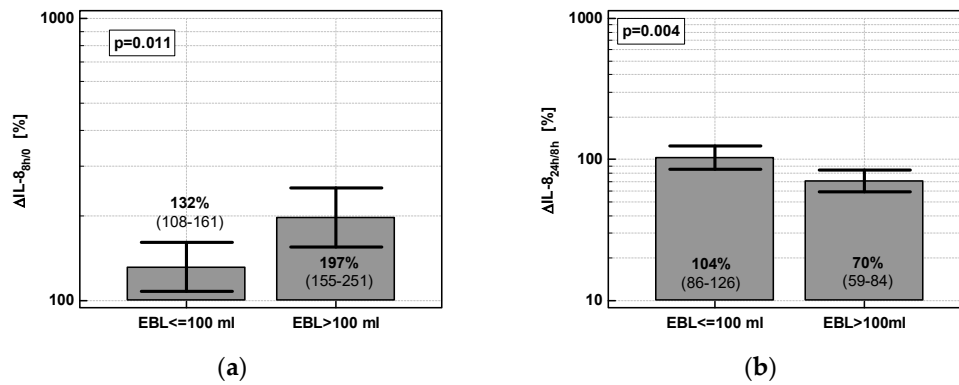

**Supplementary Figure S2.** Effect of estimated blood loss (EBL) on percentage change in IL-8: **(a)** percentage change between 8h post incision and preoperative chemokine level ( $\Delta IL-8_{8h/0}$ ); **(b)** percentage change between 24h and 8h post incision ( $\Delta IL-8_{24h/8h}$ ). Data presented as geometric means with 95%CI and analyzed using t-test for independent samples.
