# Supplementary material for: Distinct Chemokine Dynamics in Early Postoperative Period after Open and Robotic Colorectal Surgery
Source: MDPI journal article supplement (doi:10.3390/jcm8060879), 2019-06-19
Supplement: s1 [file s1]

Supplementary Figure S8

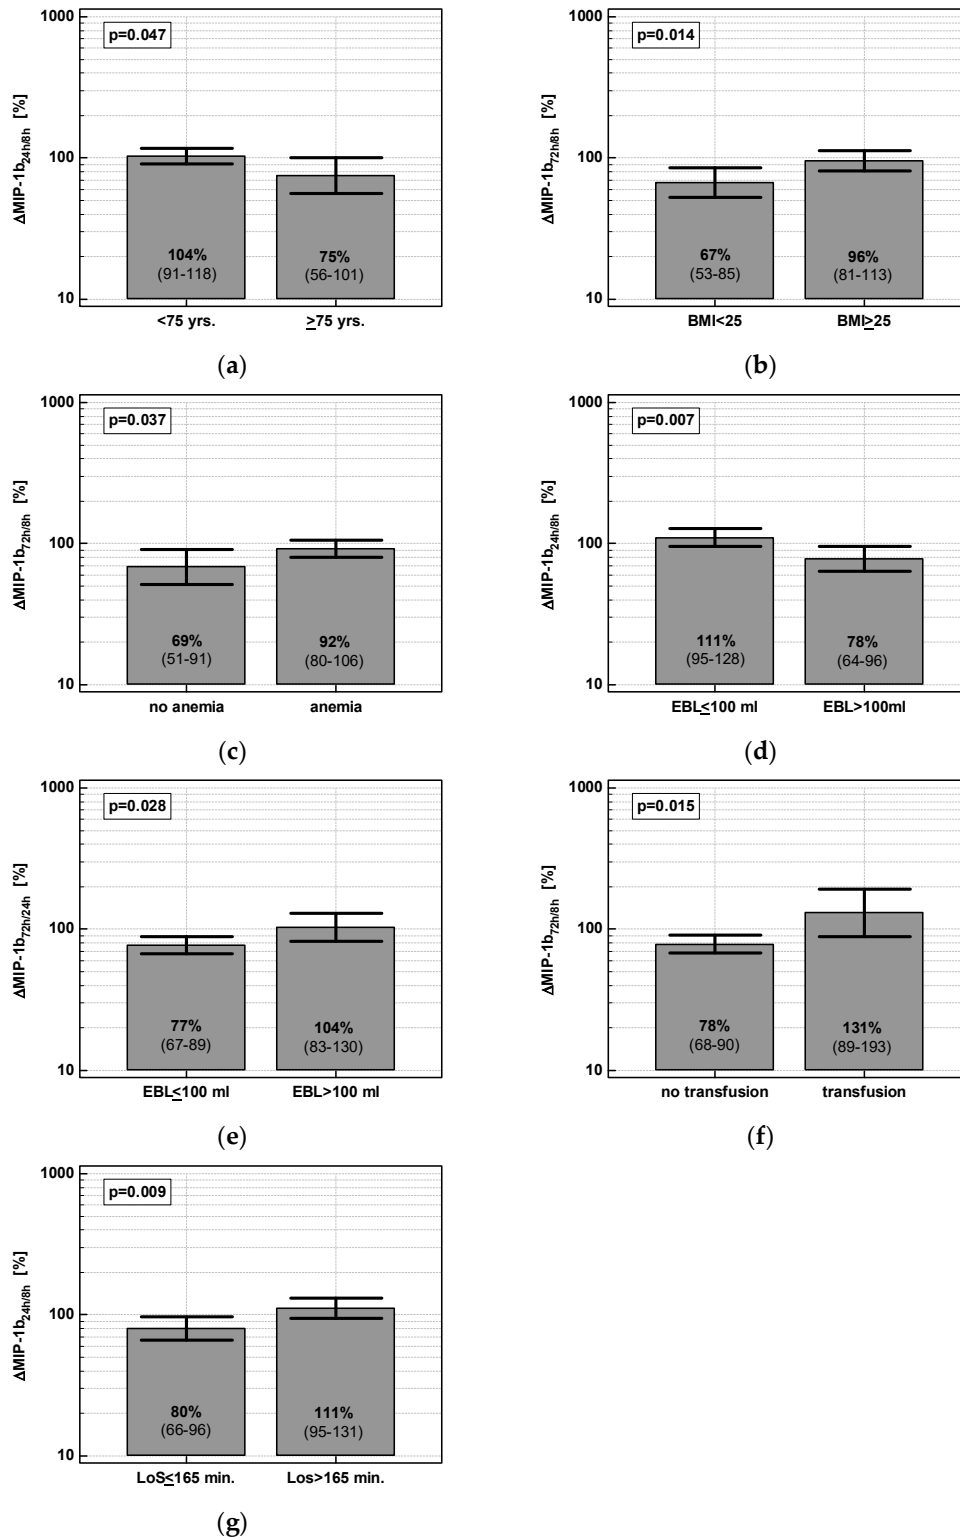

**Supplementary Figure S8.** Effect of various clinical parameters on percentage change in MIP-1 $\beta$ : (a) patients' age on  $\Delta\text{MIP-1}\beta_{\text{24h/8h}}$ ; (b) patient's BMI on  $\Delta\text{MIP-1}\beta_{\text{72h/8h}}$ ; (c) anemia on  $\Delta\text{MIP-1}\beta_{\text{72h/8h}}$ ; (d) estimated blood loss (EBL) on  $\Delta\text{MIP-1}\beta_{\text{24h/8h}}$ ; (e) estimated blood loss (EBL) on  $\Delta\text{MIP-1}\beta_{\text{72h/24h}}$ ; (f) transfusions on  $\Delta\text{MIP-1}\beta_{\text{72h/8h}}$ ; (g) length of surgery (LoS) on  $\Delta\text{MIP-1}\beta_{\text{24h/8h}}$ . Data presented as geometric means with 95%CI and analyzed using t-test for independent samples.
