# Supplementary material for: Distinct Chemokine Dynamics in Early Postoperative Period after Open and Robotic Colorectal Surgery
Source: MDPI journal article supplement (doi:10.3390/jcm8060879), 2019-06-19
Supplement: s1 [file s1]

Supplementary Figure S12

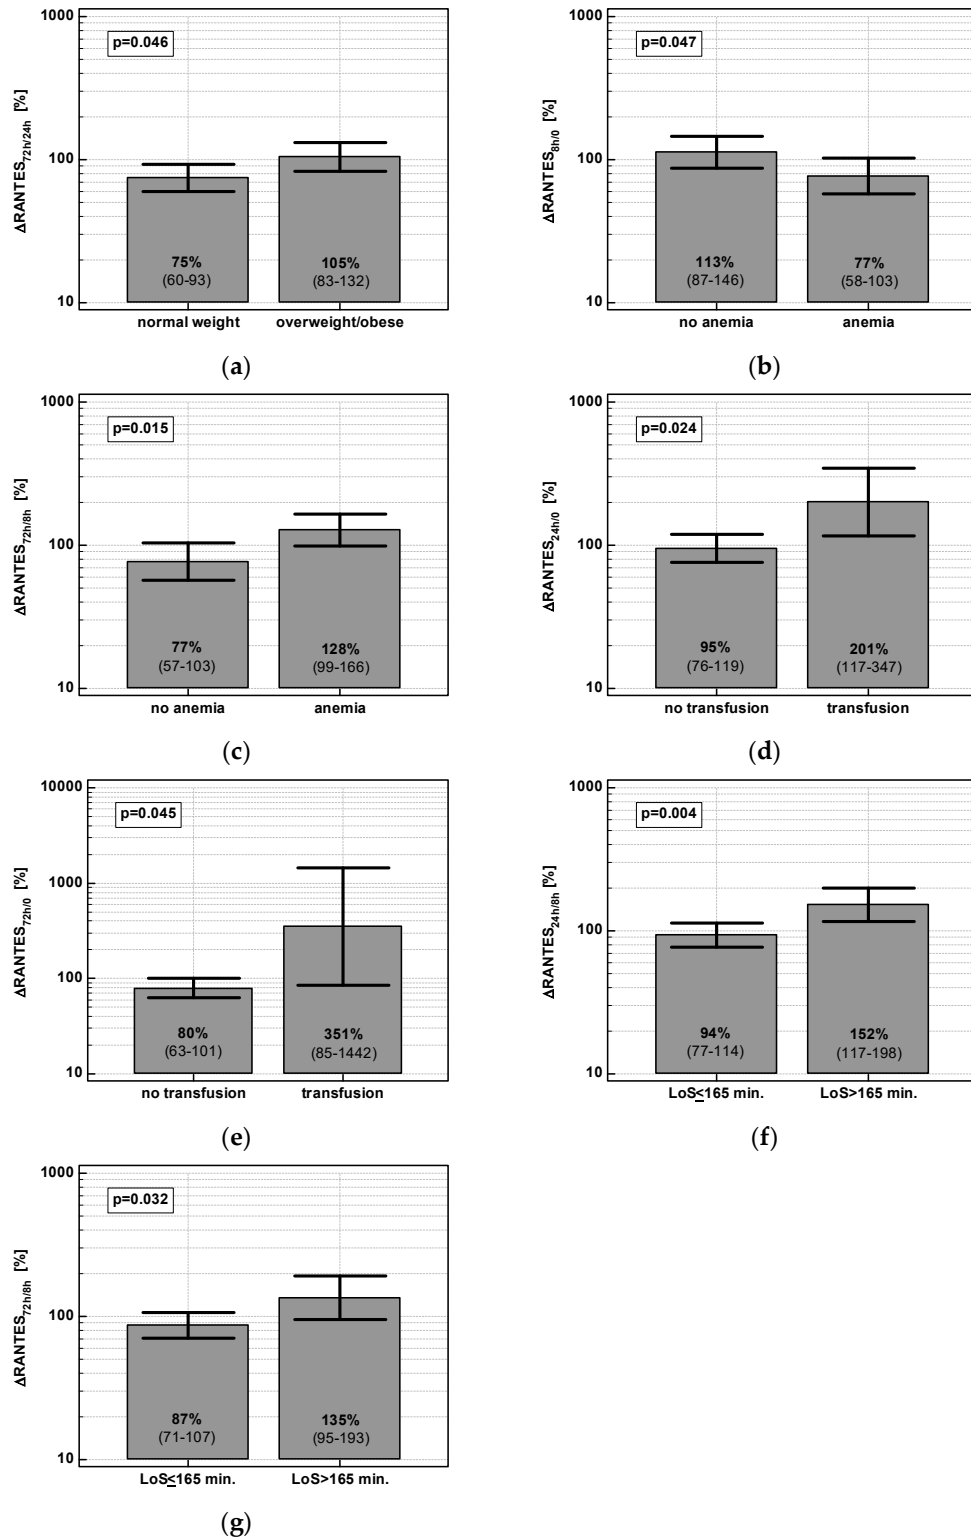

**Supplementary Figure S12.** Effect of various clinical parameters on percentage change in RANTES: (a) patients' BMI on  $\Delta \text{RANTES}_{72\text{h}/24\text{h}}$ ; (b) anemia on  $\Delta \text{RANTES}_{8\text{h}/0}$ ; (c) anemia on  $\Delta \text{RANTES}_{72\text{h}/8\text{h}}$ ; (d) transfusion on  $\Delta \text{RANTES}_{24\text{h}/0}$ ; (e) transfusion on  $\Delta \text{RANTES}_{72\text{h}/0}$ ; (f) length of surgery (LoS) on  $\Delta \text{RANTES}_{24\text{h}/8\text{h}}$ ; (h) length of surgery (LoS) on  $\Delta \text{RANTES}_{72\text{h}/8\text{h}}$ . Data presented as geometric means with 95%CI and analyzed using t-test for independent samples.
