# Supplementary material for: Distinct Chemokine Dynamics in Early Postoperative Period after Open and Robotic Colorectal Surgery
Source: MDPI journal article supplement (doi:10.3390/jcm8060879), 2019-06-19
Supplement: s1 [file s1]

Supplementary Figure S9

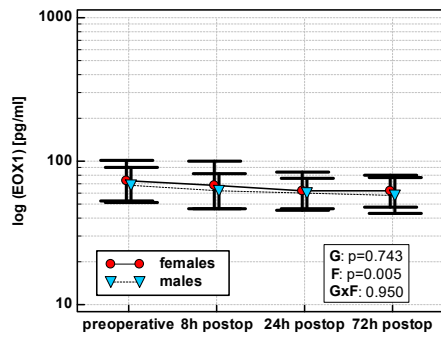

(a)

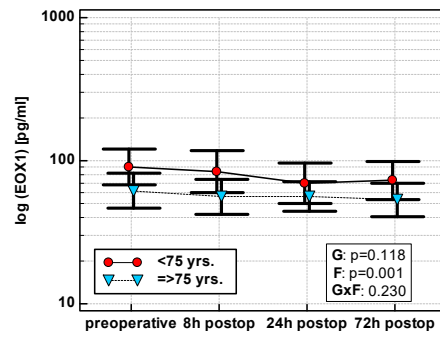

(b)

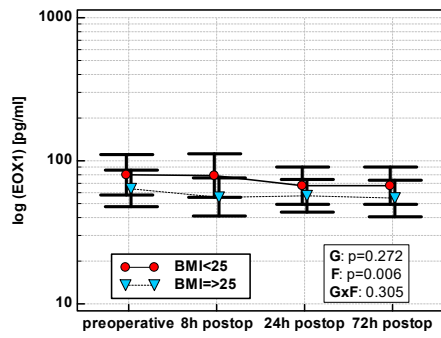

(c)

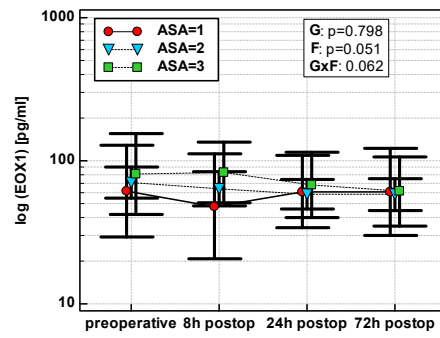

(d)

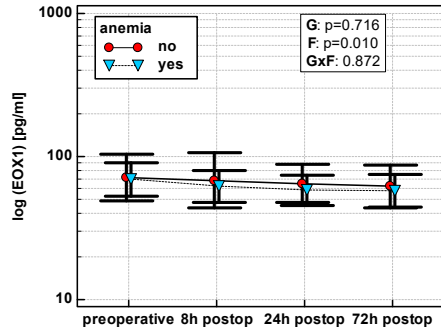

(e)

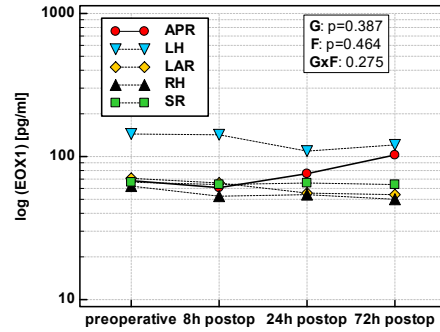

(f)

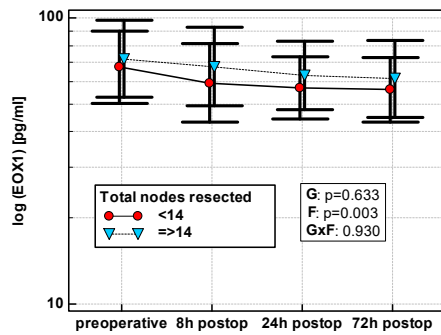

(g)

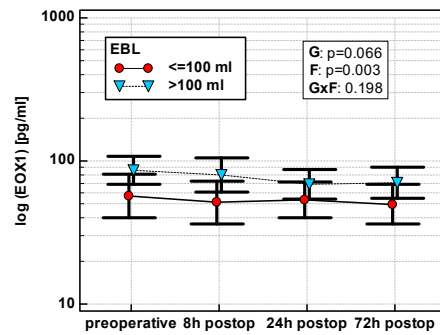

(h)

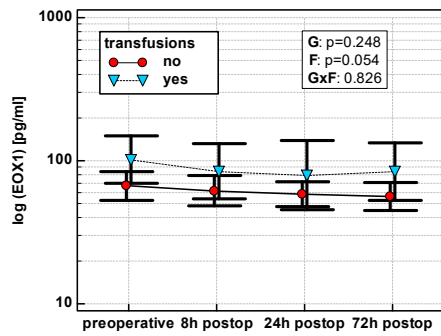

(i)

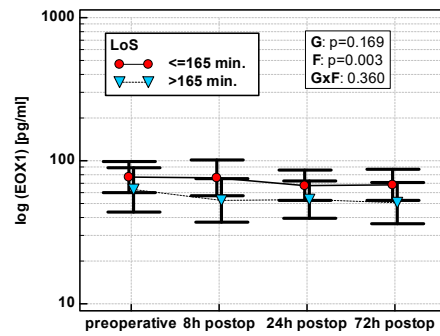

(j)

**Supplementary Figure S9.** Effect of various clinical parameters on perioperative eotaxin (EOX)-1 dynamics: (a) sex; (b) age; (c) BMI; (d) physical status classification system (ASA); (e) anemia; (f) surgical procedure; (g) total number of resected lymph nodes; (h) estimated blood loss (EBL); (i) transfusions; (j) length of surgery (LoS). Data analyzed using two-way ANOVA with repeated measures on one factor. G, significance of group effect; F, significance of factor effect (time points); G×F, significance of interaction effect; APR, abdominoperineal resection; LAR, low anterior resection; RH, right hemicolectomy; LH; left hemicolectomy; SR, sigmoid resection.
